# Supplementary material for: System-Based Differential Gene Network Analysis for Characterizing a Sample-Specific Subnetwork
Source: MDPI journal article supplement (doi:10.3390/biom10020306), 2020-02-14
Supplement: s1 [file s1]

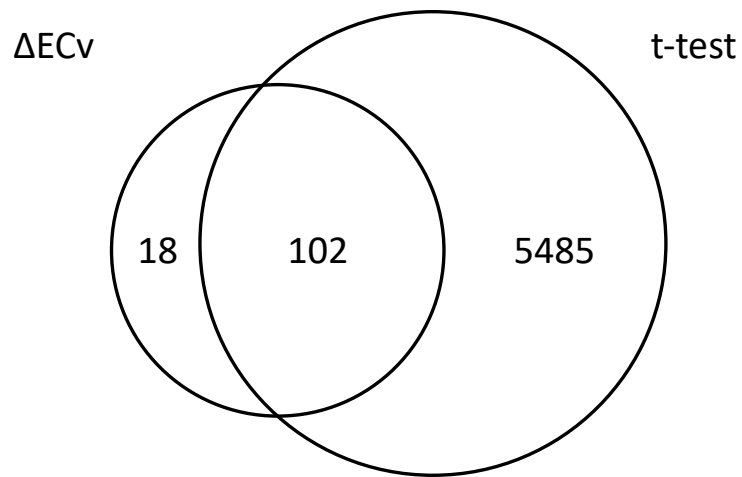

**Figure S1:** Venn diagram for  $\Delta ECv$ -extracted edges and t-test-significant edges  
The t-test for ECv between TGF $\beta$ -treated (9 samples) and control (9samples) were performed. The t-test-significant edges were selected with a criteria of FDR-corrected p value < 0.01. The number of the obtained edges was displayed in Venn diagram.

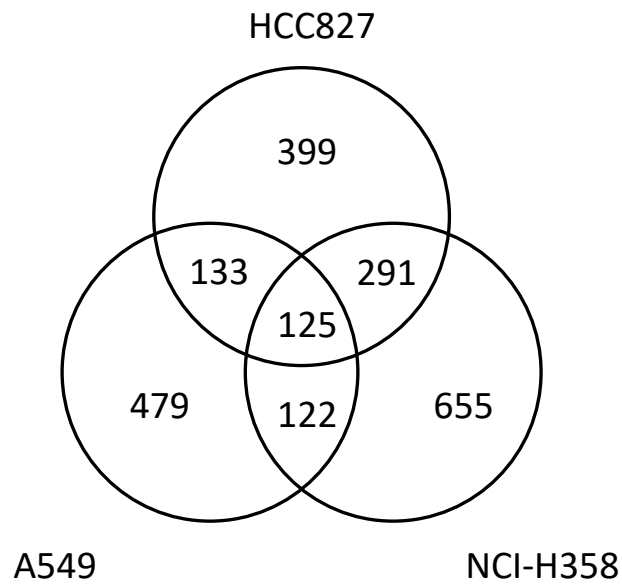

**Figure S2:** Venn diagram for DEG analysis

DEG analysis was performed with the criteria of absolute  $\log_2FC > 2$  and FDR-corrected p value  $< 0.00001$  for each cell line; A549, HCC827 and NCIH-358. The number of the obtained genes was displayed in Venn diagram.

(A)

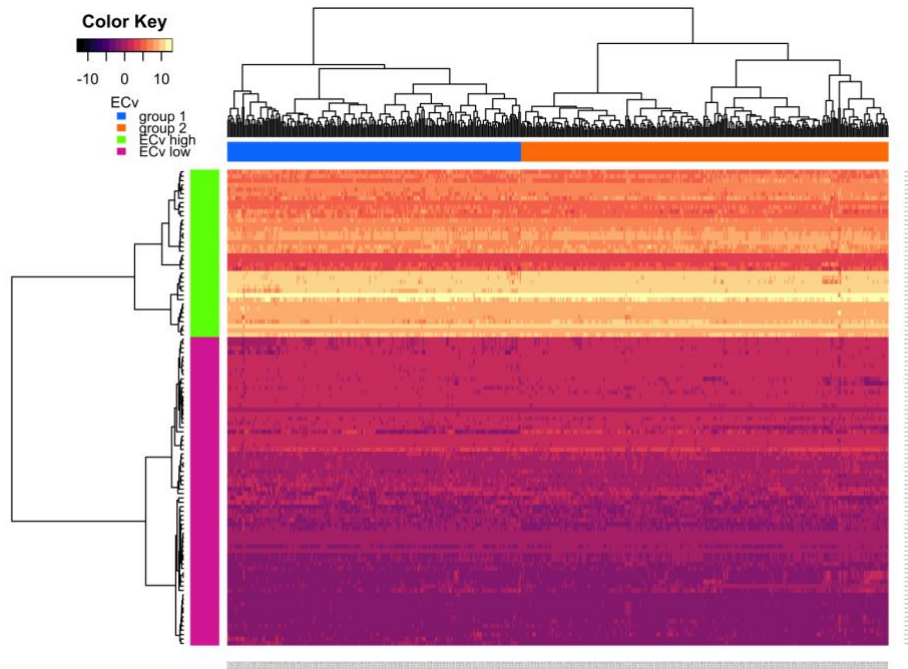

(B)

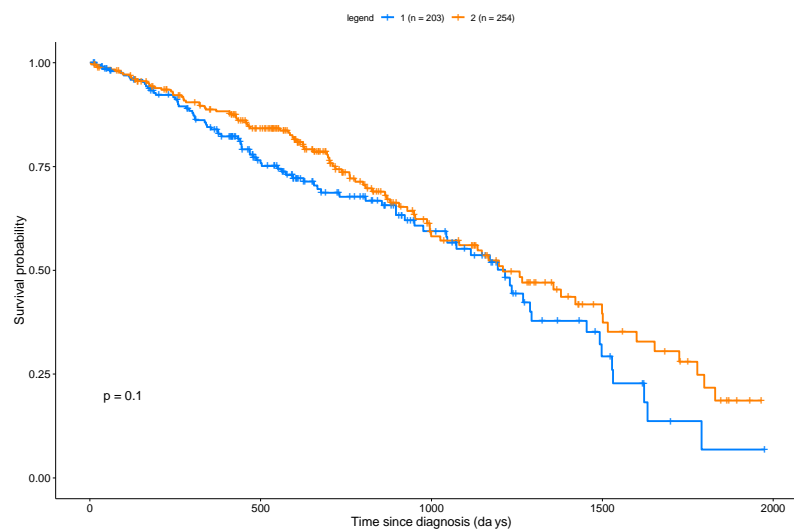

**Figure S3:** Unsupervised clustering and survival analysis for LUAD

(A) Heat map with hierarchical clustering for the ECv matrix of 108 edges with 457 samples in LUAD RNA-Seq data. (B) Kaplan-Meier curves for the two patient groups; group 1 (blue, n: 203) and group 2 (orange, n: 254), corresponding the patient clusters in the heat map in A. The survival analysis was performed using log rank-test for p value calculation.

**Table S1:** The list of the number of edges and average degrees for different thresholds

| threshold | edges  | degree average |
|-----------|--------|----------------|
| 0.05      | 286675 | 28.89          |
| 0.10      | 154369 | 15.55          |
| 0.15      | 101793 | 10.26          |
| 0.20      | 74085  | 7.46           |
| 0.30      | 38735  | 3.90           |

**Table S2:** Summary for data acquisition in this study

| Data                   | Download source | Download data | Version    | Link                                                                                                                                                                                                                                                                                                                                                                                                  |
|------------------------|-----------------|---------------|------------|-------------------------------------------------------------------------------------------------------------------------------------------------------------------------------------------------------------------------------------------------------------------------------------------------------------------------------------------------------------------------------------------------------|
| Microarray<br>GSE49644 | GEO             | 6 Mar, 2019   | -          | <a href="https://www.ncbi.nlm.nih.gov/geo/query/acc.cgi?acc=GSE49644">https://www.ncbi.nlm.nih.gov/geo/query/acc.cgi?acc=GSE49644</a><br>(GSE49644_annotated_results.txt.gz)                                                                                                                                                                                                                          |
| LUSC<br>RNA-seq        | UCSC Xena       | 9 Dec, 2019   | 2017-10-13 | <a href="https://xenabrowser.net/datapages/?dataset=TCGA.LUSC.sampleMap%2FHiSeqV2&amp;host=https%3A%2F%2Ftcga.xenahubs.net&amp;removeHub=https%3A%2F%2Ffxena.treehouse.gi.ucsc.edu%3A443">https://xenabrowser.net/datapages/<br/>?dataset=TCGA.LUSC.sampleMap%2FHiSeqV2<br/>&amp;host=https%3A%2F%2F<br/>tcga.xenahubs.net&amp;removeHub<br/>=https%3A%2F%2<br/>Fxena.treehouse.gi.ucsc.edu%3A443</a> |
| LUSC<br>clinical       | TCGA            | 9 Dec, 2019   | -          | <a href="https://portal.gdc.cancer.gov/projects/TCGA-LUSC">https://portal.gdc.cancer.gov/projects/TCGA-LUSC</a>                                                                                                                                                                                                                                                                                       |
| LUAD<br>RNA-seq        | UCSC Xena       | 9 Dec, 2019   | 2017-10-13 | <a href="https://xenabrowser.net/datapages/?dataset=TCGA.LUAD.sampleMap%2FHiSeqV2&amp;host=https%3A%2F%2Ftcga.xenahubs.net&amp;removeHub=https%3A%2F%2Ffxena.treehouse.gi.ucsc.edu%3A443">https://xenabrowser.net/datapages/<br/>?dataset=TCGA.LUAD.sampleMap%2FHiSeqV2<br/>host=https%3A%2F%2F<br/>tcga.xenahubs.net&amp;removeHub<br/>=https%3A%2F%2<br/>Fxena.treehouse.gi.ucsc.edu%3A443</a>      |
| LUAD<br>clinical       | TCGA            | 9 Dec, 2019   | -          | <a href="https://portal.gdc.cancer.gov/projects/TCGA-LUAD">https://portal.gdc.cancer.gov/projects/TCGA-LUAD</a>                                                                                                                                                                                                                                                                                       |

**Table S3:** The description list of supplementary files.

| File                       | Description                                                                                                                                                                                                                                                                                                                                                                                                                                                                                                          |
|----------------------------|----------------------------------------------------------------------------------------------------------------------------------------------------------------------------------------------------------------------------------------------------------------------------------------------------------------------------------------------------------------------------------------------------------------------------------------------------------------------------------------------------------------------|
| GSE49644GN.txt             | The basal gene network file consisting of 19,849 genes and 154,369 edges. The file is a tab separated text file. The first row is the header row representing the meanings of columns. Each line represents a single edge. The first column is a parent gene name, and the second a child gene name of an edge. The estimated <i>B</i> -spline model parameters are also included. This can be used as an input network for ECv calculation software which is provided for noncommercial, academic use upon request. |
| GSE49644GN_EMT.txt         | The $\Delta\text{ECv} \geq 1.0$ EMT-induced 120 edges consisting of 150 genes. The file is a tab separated text file. The first row is the header row representing the meanings of columns. Each line represents a single edge. The first column is a parent gene name, and the second a child gene name of an edge. The estimated <i>B</i> -spline model parameters are also included. This can be used as an input network for ECv calculation software mentioned above.                                           |
| GSE49644_EMT_ECv.txt       | ECv matrix of the EMT network with GSE49644 18 sample data. The file is tab separated text file with the header row and the label column. The header row contains the names of 18 samples. The label column contains the name ( <i>parent-child</i> ) of 120 edges.                                                                                                                                                                                                                                                  |
| basal_hubgenes_top5per.txt | The top 5% hub genes (1156) in the basal network in Figure 4. The file is tab separated text file with the header row. The header row contains the gene name and the number of outdegree.                                                                                                                                                                                                                                                                                                                            |
| EMT_hubgenes_top5per.txt   | The top 5% hub genes (7) in the EMT network in Figure 4. The file is tab separated text file with the header row. The header row contains the gene name and the number of outdegree.                                                                                                                                                                                                                                                                                                                                 |
| DEG_ECv_shared_genes.txt   | The $\Delta\text{ECv}$ and DEG shared 71 genes in Figure 5.                                                                                                                                                                                                                                                                                                                                                                                                                                                          |
| DEG_genes.txt              | The DEG analysis extracted 125 genes in Figure 5.                                                                                                                                                                                                                                                                                                                                                                                                                                                                    |
| ECv_matrix_TCGA_LUSC.txt   | ECv matrix of 108 edges for TCGA LUSC cancer 426 patient data in Figure 6. The file is tab separated text file with the header row and the label column. The label column contains the name ( <i>parent-child</i> ) of 108 edges commonly exist both in the EMT network and TCGA LUSC data.                                                                                                                                                                                                                          |
| ECv_matrix_TCGA_LUAD.txt   | ECv matrix of 108 edges for TCGA LUAD cancer 457 patient data in Figure S2. The file is tab separated text file with the header row and the label column. The label column contains the name ( <i>parent-child</i> ) of 108 edges commonly exist both in the EMT network and TCGA LUAD data.                                                                                                                                                                                                                         |
| GSE49644GN_all_EMT.cys     | The basal network file for Cytoscape used in Figure 1.                                                                                                                                                                                                                                                                                                                                                                                                                                                               |
| GSE49644GN_EMT.cys         | The EMT network file for Cytoscape used in Figure 4.                                                                                                                                                                                                                                                                                                                                                                                                                                                                 |
